# Supplementary material for: Visual Equivalence and Amodal Completion in Cuttlefish
Source: Front Physiol. 2017 Feb 6;8:40. doi: 10.3389/fphys.2017.00040 (PMC5292434; doi:10.3389/fphys.2017.00040)
Supplement: Supplementary file 1 [file DataSheet1.XLSX]

## Sheet: Traing Records_Individual
	Correct % during Training:
	5 trials per day
		Animal	A1	A2	B1	B2	B3	B4	B8	B9	B10	C1	C2	C4	C5	C6	C7	C8
		Day 1	20	0	0	20	0	0	0	80	0	0	0	0	0	0	0	0
		Day 2	0	0	0	0	0	40	0	60	20	0	0	0	0	0	20	0
		Day 3	0	0	60	0	0	40	80	20	60	20	0	0	20	0	0	20
		Day 4	0	60	60	0	0	60	80	20	100	40	0	0	0	20	0	0
		Day 5	20	60	0	0	20	20		0	80	20	0	0	20	0	60	0
		Day 6	20	80	20	0	20	40		40		60	0	0	0	0	40	0
		Day 7	0	40	60	0	0	40		20		100	0	0	0	0	60	70
		Day 8	0	40	60	0	0	60		0		100	0	40	0	0	80	0
		Day 9	0	20	80	20	0	60		20			20	40	0	0	100	0
		Day 10	80	40	100	40	0	80		60			0	0	100	20		0
		Day 11	40	80		60	0	60		60			20	20	100	0		20
		Day 12	80	40		60	0	60		40			60	0		0		80
		Day 13	60	60		60	0	100		40			80	40		20		100
		Day 14	40	60		60	40	60		80			60	0		0
		Day 15	100	60		60	0	40		60			20	20		0
		Day 16	100	80		80	40	60		20			0	60		0
		Day 17		50		100	80	0		80			0	80		20
		Day 18		40			100	80		80			0	80		0
		Day 19		60				80					60			0
		Day 20		100									40			0
		Day 21		80									80			0
		Day 22											100			0
		Day 23														0
		Day 24														60
		Day 25														100
		Day 26														100
	Number of trials before reaching criteria		80	105	50	85	90	95	20	90	25	40	110	90	55	130	45	65

## Sheet: Raw Data_Individual
	Score:
		Correct	5	4	3	2	1
		Incorrect	-5	-4	-3	-2	-1
	Stimulus:	Reduced Size
		Animal	A1	B1	B2	B3	B4	B8	B9	B10	C1	C2	C4	C5	C6	C7
		Trial 1	-3	5	-3	5	5	5	3	5	5	---	5	---	---	---
		Trial 2	-3	5	5	5	5	-2	3	5	5	---	5	---	---	---
		Trial 3	3	5	-3	2	5	5	3	5	5	---	5	---	---	---
		Trial 4	5	5	5	5	5	5	3	5	5	---	5	---	---	---
		Trial 5	3	5	5	-4	5	5	-3	-3	5	---	5	---	---	---
		Trial 6	-3	5	5	5	5	5	5	5	5	---	5	---	---	---
		Trial 7	-3	5	5	-2	5	5	3	5	5	---	5	---	---	---
		Trial 8	3	5	5	5	5	5	5	5	5	---	5	---	---	---
		Trial 9	-3	5	5	5	5	5	3	5	5	---	5	---	---	---
		Trial 10	3	5	-3	-2	5	0	3	5	-5	---	5	---	---	---
		Correct Response	5	10	7	7	10	8	9	9	9	---	10	---	---	---
		Incorrect Response	5	0	3	3	0	1	1	1	1	---	0	---	---	---
		No Response	0	0	0	0	0	1	0	0	0	---	0	---	---	---
		Correct %	0.5	1	0.7	0.7	1	0.888889	0.9	0.9	0.9	---	1	---	---	---
		Binomial Test
		P	0.623	0.001	0.172	0.172	0.001	0.0195	0.0105	0.0105	0.0105	---	0.001	---	---	---
	Stimulus:	Low Contrast
		Animal	A1	B1	B2	B3	B4	B8	B9	B10	C1	C2	C4	C5	C6	C7
		Trial 1	---	2	-3	3	5	3	---	---	5	---	3	---	---	---
		Trial 2	---	1	-3	0	-1	0	---	---	5	---	0	---	---	---
		Trial 3	---	-2	-1	-3	0	-3	---	---	5	---	3	---	---	---
		Trial 4	---	-3	-3	0	1	2	---	---	5	---	-3	---	---	---
		Trial 5	---	-4	-3	0	0	-2	---	---	5	---	-3	---	---	---
		Trial 6	---	-3	1	1	2	1	---	---	5	---	3	---	---	---
		Trial 7	---	-3	3	-3	2	-1	---	---	5	---	3	---	---	---
		Trial 8	---	-4	-2	-2	2	0	---	---	5	---	3	---	---	---
		Trial 9	---	-4	3	2	4	-1	---	---	5	---	3	---	---	---
		Trial 10	---	4	1	-3	4	0	---	---	5	---	-3	---	---	---
		Correct Response	---	3	4	3	7	3	---	---	10	---	6	---	---	---
		Incorrect Response	---	7	6	4	1	4	---	---	0	---	3	---	---	---
		No Response	---	0	0	3	2	3	---	---	0	---	1	---	---	---
		Correct %	---	0.3	0.4	0.428571	0.875	0.428571	---	---	1	---	0.666667	---	---	---
		Binomial Test
		P	---	0.172	0.377	0.5	0.035	0.5	---	---	0.001	---	0.254	---	---	---
	Stimulus:	Sketch
		Animal	A1	B1	B2	B3	B4	B8	B9	B10	C1	C2	C4	C5	C6	C7
		Trial 1	5	-3	3	-3	5	5	3	---	5	5	5	5	5	5
		Trial 2	5	0	2	4	5	5	-3	---	5	3	5	-3	0	5
		Trial 3	4	-4	0	3	4	-4	3	---	4	3	5	0	2	-4
		Trial 4	3	-4	3	4	5	4	3	---	5	3	5	0	0	-4
		Trial 5	3	-2	3	0	5	2	-3	---	-5	1	5	0	2	4
		Trial 6	-3	3	3	-3	-3	5	-3	---	2	-3	2	3	1	-2
		Trial 7	3	-3	-3	-4	5	3	-3	---	4	4	0	0	-2	3
		Trial 8	0	-2	3	3	5	-2	0	---	4	0	5	0	1	3
		Trial 9	-3	-4	-3	0	-3	-1	1	---	-4	0	5	-1	1	3
		Trial 10	-3	-1	3	4	5	1	3	---	2	-1	2	-3	-1	3
		Correct Response	6	1	7	5	8	7	5	---	8	6	9	2	6	7
		Incorrect Response	3	8	2	3	2	3	4	---	2	2	0	3	2	3
		No Response	1	1	1	2	0	0	1	---	0	2	1	5	2	0
		Correct %	0.666667	0.111111	0.777778	0.625	0.8	0.7	0.555556	---	0.8	0.75	1	0.4	0.75	0.7
		Binomial Test
		P	0.254	0.0195	0.09	0.363	0.0545	0.172	0.5	---	0.0545	0.1445	0.002	0.5	0.1445	0.172
	Stimulus:	Contour
		Animal	A1	B1	B2	B3	B4	B8	B9	B10	C1	C2	C4	C5	C6	C7
		Trial 1	---	2	---	2	3	2	---	---	-4	---	-3	---	---	---
		Trial 2	---	3	---	2	-1	-1	---	---	0	---	3	---	---	---
		Trial 3	---	0	---	0	-4	1	---	---	-3	---	-3	---	---	---
		Trial 4	---	3	---	0	-4	3	---	---	-4	---	-3	---	---	---
		Trial 5	---	-3	---	1	4	-1	---	---	-4	---	3	---	---	---
		Trial 6	---	-3	---	-4	3	2	---	---	4	---	-1	---	---	---
		Trial 7	---	-3	---	-4	-4	-1	---	---	4	---	-1	---	---	---
		Trial 8	---	-3	---	1	-4	-2	---	---	-4	---	-2	---	---	---
		Trial 9	---	-4	---	-3	4	1	---	---	-4	---	-3	---	---	---
		Trial 10	---	-4	---	3	-4	0	---	---	0	---	-3	---	---	---
		Correct Response	---	3	---	5	4	5	---	---	2	---	2	---	---	---
		Incorrect Response	---	6	---	3	6	4	---	---	6	---	8	---	---	---
		No Response	---	1	---	2	0	1	---	---	2	---	0	---	---	---
		Correct %	---	0.333333	---	0.625	0.4	0.555556	---	---	0.25	---	0.2	---	---	---
		Binomial Test
		P	---	0.254	---	0.363	0.377	0.5	---	---	0.1445	---	0.0545	---	---	---
	Stimulus:	Black Silhouette
		Animal	A1	B1	B2	B3	B4	B8	B9	B10	C1	C2	C4	C5	C6	C7
		Trial 1	---	2	---	5	5	---	---	---	5	5	5	---	---	---
		Trial 2	---	-2	---	5	5	---	---	---	5	5	5	---	---	---
		Trial 3	---	-4	---	3	5	---	---	---	5	5	5	---	---	---
		Trial 4	---	-3	---	-2	5	---	---	---	5	5	5	---	---	---
		Trial 5	---	-2	---	2	5	---	---	---	5	5	5	---	---	---
		Trial 6	---	-3	---	-2	3	---	---	---	5	-4	5	---	---	---
		Trial 7	---	-3	---	0	-3	---	---	---	4	5	5	---	---	---
		Trial 8	---	-4	---	-1	-2	---	---	---	4	3	5	---	---	---
		Trial 9	---	4	---	-2	0	---	---	---	-3	5	5	---	---	---
		Trial 10	---	3	---	0	3	---	---	---	3	5	5	---	---	---
		Correct Response	---	3	---	4	7	---	---	---	9	9	10	---	---	---
		Incorrect Response	---	7	---	4	2	---	---	---	1	1	0	---	---	---
		No Response	---	0	---	2	1	---	---	---	0	0	0	---	---	---
		Correct %	---	0.3	---	0.5	0.777778	---	---	---	0.9	0.9	1	---	---	---
		Binomial Test
		P	---	0.172	---	0.637	0.09	---	---	---	0.0105	0.0105	0.001	---	---	---
	Stimulus:	White Silhouette
		Animal	A1	B1	B2	B3	B4	B8	B9	B10	C1	C2	C4	C5	C6	C7
		Trial 1	---	-3	---	-5	3	---	---	---	4	3	3	---	---	---
		Trial 2	---	-3	---	-3	4	---	---	---	-3	-1	0	---	---	---
		Trial 3	---	-4	---	-2	-3	---	---	---	5	0	0	---	---	---
		Trial 4	---	3	---	-1	3	---	---	---	4	1	0	---	---	---
		Trial 5	---	-2	---	0	2	---	---	---	0	-1	0	---	---	---
		Trial 6	---	3	---	2	3	---	---	---	-3	2	5	---	---	---
		Trial 7	---	3	---	-1	-4	---	---	---	4	2	5	---	---	---
		Trial 8	---	-3	---	-2	-3	---	---	---	4	2	5	---	---	---
		Trial 9	---	-3	---	2	3	---	---	---	3	-1	0	---	---	---
		Trial 10	---	-3	---	-3	-3	---	---	---	4	1	5	---	---	---
		Correct Response	---	3	---	2	6	---	---	---	7	6	5	---	---	---
		Incorrect Response	---	7	---	7	4	---	---	---	2	3	0	---	---	---
		No Response	---	0	---	1	0	---	---	---	1	1	5	---	---	---
		Correct %	---	0.3	---	0.222222	0.6	---	---	---	0.777778	0.666667	1	---	---	---
		Binomial Test
		P	---	0.172	---	0.09	0.377	---	---	---	0.09	0.254	0.031	---	---	---
	Stimulus:	Partial Occlusion
		Animal	A1	B1	B2	B3	B4	B8	B9	B10	C1	C2	C4	C5	C6	C7
		Trial 1	---	5	---	-2	-3	---	---	---	2	3	5	---	5	5
		Trial 2	---	3	---	5	-4	---	---	---	-2	0	-2	---	3	5
		Trial 3	---	3	---	5	-3	---	---	---	0	-3	2	---	5	5
		Trial 4	---	3	---	5	4	---	---	---	0	-3	0	---	0	5
		Trial 5	---	1	---	-1	-3	---	---	---	-2	1	2	---	5	5
		Trial 6	---	-1	---	1	4	---	---	---	4	2	2	---	1	5
		Trial 7	---	3	---	-3	5	---	---	---	2	0	5	---	1	0
		Trial 8	---	2	---	5	-4	---	---	---	2	0	5	---	0	5
		Trial 9	---	0	---	0	3	---	---	---	-2	0	0	---	0	5
		Trial 10	---	1	---	3	4	---	---	---	-2	0	5	---	0	5
		Correct Response	---	8	---	6	5	---	---	---	4	3	7	---	6	9
		Incorrect Response	---	1	---	3	5	---	---	---	4	2	1	---	0	0
		No Response	---	1	---	1	0	---	---	---	2	5	2	---	4	1
		Correct %	---	0.888889	---	0.666667	0.5	---	---	---	0.5	0.6	0.875	---	1	1
		Binomial Test
		P	---	0.0195	---	0.254	0.623	---	---	---	0.637	0.5	0.035	---	0.016	0.002
	Stimulus:	Posteriorly Occlusion
		Animal	A1	B1	B2	B3	B4	B8	B9	B10	C1	C2	C4	C5	C6	C7
		Trial 1	---	---	---	---	---	---	---	---	5	---	5	---	-5	5
		Trial 2	---	---	---	---	---	---	---	---	5	---	5	---	5	5
		Trial 3	---	---	---	---	---	---	---	---	5	---	5	---	5	5
		Trial 4	---	---	---	---	---	---	---	---	5	---	5	---	5	5
		Trial 5	---	---	---	---	---	---	---	---	-5	---	5	---	5	5
		Trial 6	---	---	---	---	---	---	---	---	5	---	5	---	5	5
		Trial 7	---	---	---	---	---	---	---	---	-5	---	5	---	5	5
		Trial 8	---	---	---	---	---	---	---	---	5	---	5	---	5	5
		Trial 9	---	---	---	---	---	---	---	---	5	---	5	---	5	5
		Trial 10	---	---	---	---	---	---	---	---	5	---	5	---	5	5
		Correct Response	---	---	---	---	---	---	---	---	8	---	10	---	9	10
		Incorrect Response	---	---	---	---	---	---	---	---	2	---	0	---	1	0
		No Response	---	---	---	---	---	---	---	---	0	---	0	---	0	0
		Correct %	---	---	---	---	---	---	---	---	0.8	---	1	---	0.9	1
		Binomial Test
		P	---	---	---	---	---	---	---	---	0.0545	---	0.001	---	0.0105	0.001
	Stimulus:	Anteriorly Occlusion
		Animal	A1	B1	B2	B3	B4	B8	B9	B10	C1	C2	C4	C5	C6	C7
		Trial 1	---	---	---	---	---	---	---	---	3	---	3	---	-1	1
		Trial 2	---	---	---	---	---	---	---	---	-3	---	5	---	5	2
		Trial 3	---	---	---	---	---	---	---	---	3	---	-3	---	5	3
		Trial 4	---	---	---	---	---	---	---	---	-3	---	3	---	-5	2
		Trial 5	---	---	---	---	---	---	---	---	4	---	-3	---	5	-1
		Trial 6	---	---	---	---	---	---	---	---	3	---	-5	---	5	1
		Trial 7	---	---	---	---	---	---	---	---	-3	---	5	---	3	1
		Trial 8	---	---	---	---	---	---	---	---	4	---	5	---	5	0
		Trial 9	---	---	---	---	---	---	---	---	3	---	5	---	5	-1
		Trial 10	---	---	---	---	---	---	---	---	-4	---	5	---	5	-2
		Correct Response	---	---	---	---	---	---	---	---	6	---	7	---	8	6
		Incorrect Response	---	---	---	---	---	---	---	---	4	---	3	---	2	3
		No Response	---	---	---	---	---	---	---	---	0	---	0	---	0	1
		Correct %	---	---	---	---	---	---	---	---	0.6	---	0.7	---	0.8	0.666667
		Binomial Test
		P	---	---	---	---	---	---	---	---	0.377	---	0.172	---	0.0545	0.254

## Sheet: Normalized Data_Individual
	Strongest Response Exhibited in Training
		Animal	A1	B1	B2	B3	B4	B8	B9	B10	C1	C2	C4	C5	C6	C7
		Level	3	5	5	5	5	5	3	5	5	5	5	5	5	5
	Stimulus:	Reduced Size
		Animal	A1	B1	B2	B3	B4	B8	B9	B10	C1	C2	C4	C5	C6	C7
		Trial 1	-1	1	-0.6	1	1	1	1	1	1	---	1	---	---	---
		Trial 2	-1	1	1	1	1	-0.4	1	1	1	---	1	---	---	---
		Trial 3	1	1	-0.6	0.4	1	1	1	1	1	---	1	---	---	---
		Trial 4	1	1	1	1	1	1	1	1	1	---	1	---	---	---
		Trial 5	1	1	1	-0.8	1	1	-1	-0.6	1	---	1	---	---	---
		Trial 6	-1	1	1	1	1	1	1	1	1	---	1	---	---	---
		Trial 7	-1	1	1	-0.4	1	1	1	1	1	---	1	---	---	---
		Trial 8	1	1	1	1	1	1	1	1	1	---	1	---	---	---
		Trial 9	-1	1	1	1	1	1	1	1	1	---	1	---	---	---
		Trial 10	1	1	-0.6	-0.4	1	0	1	1	-1	---	1	---	---	---		Average of Average		Standard Error
		Average	0	1	0.52	0.48	1	0.844444	0.8	0.84	0.8	---	1	---	---	---		0.728444		0.09962
		Standard Error	0.333333	0	0.244404	0.231325	0	0.155556	0.2	0.16	0.2	---	0	---	---	---
		Wilcoxon Signed-Rank Test
		W	0	55	43	39	55	43	44	53	44	---	55	---	---	---
		Z	0	-3.162	-2.282	-2.04	-3.162	-2.758	-2.53	-2.94	-2.53	---	-3.162	---	---	---
		P	0.5	0.001	0.011	0.0205	0.001	0.003	0.0055	0.0015	0.0055	---	0.001	---	---	---
	Stimulus:	Low Contrast
		Animal	A1	B1	B2	B3	B4	B8	B9	B10	C1	C2	C4	C5	C6	C7
		Trial 1	---	0.4	-0.6	0.6	1	0.6	---	---	1	---	0.6	---	---	---
		Trial 2	---	0.2	-0.6	0	-0.2	0	---	---	1	---	0	---	---	---
		Trial 3	---	-0.4	-0.2	-0.6	0	-0.6	---	---	1	---	0.6	---	---	---
		Trial 4	---	-0.6	-0.6	0	0.2	0.4	---	---	1	---	-0.6	---	---	---
		Trial 5	---	-0.8	-0.6	0	0	-0.4	---	---	1	---	-0.6	---	---	---
		Trial 6	---	-0.6	0.2	0.2	0.4	0.2	---	---	1	---	0.6	---	---	---
		Trial 7	---	-0.6	0.6	-0.6	0.4	-0.2	---	---	1	---	0.6	---	---	---
		Trial 8	---	-0.8	-0.4	-0.4	0.4	0	---	---	1	---	0.6	---	---	---
		Trial 9	---	-0.8	0.6	0.4	0.8	-0.2	---	---	1	---	0.6	---	---	---
		Trial 10	---	0.8	0.2	-0.6	0.8	0	---	---	1	---	-0.6	---	---	---		Average of Average		Standard Error
		Average	---	-0.32	-0.14	-0.142857	0.475	-0.0285714	---	---	1	---	0.2	---	---	---		0.149082		0.172742
		Standard Error	---	0.181842	0.157903	0.198635	0.135949	0.16578	---	---	0	---	0.2	---	---	---
		Wilcoxon Signed-Rank Test
		W	---	-31	-17	-10	33	-2	---	---	55	---	15	---	---	---
		Z	---	-1.596	-0.889	-0.862	-2.328	-0.171	---	---	-3.162	---	-1	---	---	---
		P	---	0.0555	0.187	0.1945	0.01	0.432	---	---	0.001	---	0.1585	---	---	---
	Stimulus:	Sketch
		Animal	A1	B1	B2	B3	B4	B8	B9	B10	C1	C2	C4	C5	C6	C7
		Trial 1	1	-0.6	0.6	-0.6	1	1	1	---	1	1	1	1	1	1
		Trial 2	1	0	0.4	0.8	1	1	-1	---	1	0.6	1	-0.6	0	1
		Trial 3	1	-0.8	0	0.6	0.8	-0.8	1	---	0.8	0.6	1	0	0.4	-0.8
		Trial 4	1	-0.8	0.6	0.8	1	0.8	1	---	1	0.6	1	0	0	-0.8
		Trial 5	1	-0.4	0.6	0	1	0.4	-1	---	-1	0.2	1	0	0.4	0.8
		Trial 6	-1	0.6	0.6	-0.6	-0.6	1	-1	---	0.4	-0.6	0.4	0.6	0.2	-0.4
		Trial 7	1	-0.6	-0.6	-0.8	1	0.6	-1	---	0.8	0.8	0	0	-0.4	0.6
		Trial 8	0	-0.4	0.6	0.6	1	-0.4	0	---	0.8	0	1	0	0.2	0.6
		Trial 9	-1	-0.8	-0.6	0	-0.6	-0.2	0.333333	---	-0.8	0	1	-0.2	0.2	0.6
		Trial 10	-1	-0.2	0.6	0.8	1	0.2	1	---	0.4	-0.2	0.4	-0.6	-0.2	0.6		Average of Average		Standard Error
		Average	0.333333	-0.444444	0.311111	0.2	0.66	0.36	0.0333333	---	0.44	0.375	0.866667	0.04	0.225	0.32		0.286154		0.0872372
		Standard Error	0.333333	0.148241	0.173561	0.256348	0.210924	0.203961	0.3	---	0.234379	0.190629	0.0881917	0.324962	0.148504	0.223507
		Wilcoxon Signed-Rank Test
		W	15	-35	23	13	49	32	1	---	29	24	45	1	19	25
		Z	-1	-2.09	-1.475	-0.933	-2.595	-1.638	-0.064	---	-1.499	-1.703	-2.81	-0.137	-1.354	-1.287
		P	0.1585	0.0185	0.07	0.1755	0.0045	0.0505	0.4745	---	0.067	0.044	0.0025	0.4455	0.088	0.099
	Stimulus:	Contour
		Animal	A1	B1	B2	B3	B4	B8	B9	B10	C1	C2	C4	C5	C6	C7
		Trial 1	---	0.4	---	0.4	0.6	0.4	---	---	-0.8	---	-0.6	---	---	---
		Trial 2	---	0.6	---	0.4	-0.2	-0.2	---	---	0	---	0.6	---	---	---
		Trial 3	---	0	---	0	-0.8	0.2	---	---	-0.6	---	-0.6	---	---	---
		Trial 4	---	0.6	---	0	-0.8	0.6	---	---	-0.8	---	-0.6	---	---	---
		Trial 5	---	-0.6	---	0.2	0.8	-0.2	---	---	-0.8	---	0.6	---	---	---
		Trial 6	---	-0.6	---	-0.8	0.6	0.4	---	---	0.8	---	-0.2	---	---	---
		Trial 7	---	-0.6	---	-0.8	-0.8	-0.2	---	---	0.8	---	-0.2	---	---	---
		Trial 8	---	-0.6	---	0.2	-0.8	-0.4	---	---	-0.8	---	-0.4	---	---	---
		Trial 9	---	-0.8	---	-0.6	0.8	0.2	---	---	-0.8	---	-0.6	---	---	---
		Trial 10	---	-0.8	---	0.6	-0.8	0	---	---	0	---	-0.6	---	---	---		Average of Average		Standard Error
		Average	---	-0.266667	---	-0.05	-0.14	0.0888889	---	---	-0.375	---	-0.26	---	---	---		-0.16713		0.0687371
		Standard Error	---	0.202759	---	0.206155	0.236737	0.116003	---	---	0.257564	---	0.152169	---	---	---
		Wilcoxon Signed-Rank Test
		W	---	-25	---	-5	-17	13	---	---	-16	---	-27	---	---	---
		Z	---	-1.53	---	-0.352	-0.9	-0.787	---	---	-1.206	---	-1.43	---	---	---
		P	---	0.063	---	0.3625	0.184	0.2155	---	---	0.114	---	0.0765	---	---	---
	Stimulus:	Black Silhouette
		Animal	A1	B1	B2	B3	B4	B8	B9	B10	C1	C2	C4	C5	C6	C7
		Trial 1	---	0.4	---	1	1	---	---	---	1	1	1	---	---	---
		Trial 2	---	-0.4	---	1	1	---	---	---	1	1	1	---	---	---
		Trial 3	---	-0.8	---	0.6	1	---	---	---	1	1	1	---	---	---
		Trial 4	---	-0.6	---	-0.4	1	---	---	---	1	1	1	---	---	---
		Trial 5	---	-0.4	---	0.4	1	---	---	---	1	1	1	---	---	---
		Trial 6	---	-0.6	---	-0.4	0.6	---	---	---	1	-0.8	1	---	---	---
		Trial 7	---	-0.6	---	0	-0.6	---	---	---	0.8	1	1	---	---	---
		Trial 8	---	-0.8	---	-0.2	-0.4	---	---	---	0.8	0.6	1	---	---	---
		Trial 9	---	0.8	---	-0.4	0	---	---	---	-0.6	1	1	---	---	---
		Trial 10	---	0.6	---	0	0.6	---	---	---	0.6	1	1	---	---	---		Average of Average		Standard Error
		Average	---	-0.24	---	0.2	0.577778	---	---	---	0.76	0.78	1	---	---	---		0.512963		0.186068
		Standard Error	---	0.190438	---	0.220389	0.211986	---	---	---	0.157198	0.18	0	---	---	---
		Wilcoxon Signed-Rank Test
		W	---	-22	---	13	37	---	---	---	52	51	55	---	---	---
		Z	---	-1.135	---	-0.923	-2.239	---	---	---	-2.716	-2.754	-3.162	---	---	---
		P	---	0.1285	---	0.178	0.0125	---	---	---	0.0035	0.003	0.001	---	---	---
	Stimulus:	White Silhouette
		Animal	A1	B1	B2	B3	B4	B8	B9	B10	C1	C2	C4	C5	C6	C7
		Trial 1	---	-0.6	---	-1	0.6	---	---	---	0.8	0.6	0.6	---	---	---
		Trial 2	---	-0.6	---	-0.6	0.8	---	---	---	-0.6	-0.2	0	---	---	---
		Trial 3	---	-0.8	---	-0.4	-0.6	---	---	---	1	0	0	---	---	---
		Trial 4	---	0.6	---	-0.2	0.6	---	---	---	0.8	0.2	0	---	---	---
		Trial 5	---	-0.4	---	0	0.4	---	---	---	0	-0.2	0	---	---	---
		Trial 6	---	0.6	---	0.4	0.6	---	---	---	-0.6	0.4	1	---	---	---
		Trial 7	---	0.6	---	-0.2	-0.8	---	---	---	0.8	0.4	1	---	---	---
		Trial 8	---	-0.6	---	-0.4	-0.6	---	---	---	0.8	0.4	1	---	---	---
		Trial 9	---	-0.6	---	0.4	0.6	---	---	---	0.6	-0.2	0	---	---	---
		Trial 10	---	-0.6	---	-0.6	-0.6	---	---	---	0.8	0.2	1	---	---	---		Average of Average		Standard Error
		Average	---	-0.24	---	-0.288889	0.1	---	---	---	0.488889	0.177778	0.92	---	---	---		0.192963		0.186607
		Standard Error	---	0.185712	---	0.153156	0.207096	---	---	---	0.208463	0.102439	0.08	---	---	---
		Wilcoxon Signed-Rank Test
		W	---	-22	---	-27	6	---	---	---	37	27	15	---	---	---
		Z	---	-1.188	---	-1.616	-0.318	---	---	---	-2.239	-1.634	-2.121	---	---	---
		P	---	0.1175	---	0.053	0.3755	---	---	---	0.0125	0.051	0.017	---	---	---
	Stimulus:	Partial Occlusion
		Animal	A1	B1	B2	B3	B4	B8	B9	B10	C1	C2	C4	C5	C6	C7
		Trial 1	---	1	---	-0.4	-0.6	---	---	---	0.4	0.6	1	---	1	1
		Trial 2	---	0.6	---	1	-0.8	---	---	---	-0.4	0	-0.4	---	0.6	1
		Trial 3	---	0.6	---	1	-0.6	---	---	---	0	-0.6	0.4	---	1	1
		Trial 4	---	0.6	---	1	0.8	---	---	---	0	-0.6	0	---	0	1
		Trial 5	---	0.2	---	-0.2	-0.6	---	---	---	-0.4	0.2	0.4	---	1	1
		Trial 6	---	-0.2	---	0.2	0.8	---	---	---	0.8	0.4	0.4	---	0.2	1
		Trial 7	---	0.6	---	-0.6	1	---	---	---	0.4	0	1	---	0.2	0
		Trial 8	---	0.4	---	1	-0.8	---	---	---	0.4	0	1	---	0	1
		Trial 9	---	0	---	0	0.6	---	---	---	-0.4	0	0	---	0	1
		Trial 10	---	0.2	---	0.6	0.8	---	---	---	-0.4	0	1	---	0	1		Average of Average		Standard Error
		Average	---	0.444444	---	0.4	0.06	---	---	---	0.05	0	0.6	---	0.666667	1		0.402639		0.124723
		Standard Error	---	0.114396	---	0.221108	0.249533	---	---	---	0.176271	0.252982	0.177281	---	0.160555	0
		Wilcoxon Signed-Rank Test
		W	---	41	---	27	12	---	---	---	4	-1	31	---	21	45
		Z	---	-2.459	---	-1.616	-0.624	---	---	---	-0.302	-0.137	-2.226	---	-2.232	-3
		P	---	0.007	---	0.053	0.2665	---	---	---	0.3815	0.4455	0.013	---	0.013	0.0015
	Stimulus:	Posteriorly Occlusion
		Animal	A1	B1	B2	B3	B4	B8	B9	B10	C1	C2	C4	C5	C6	C7
		Trial 1	---	---	---	---	---	---	---	---	1	---	1	---	-1	1
		Trial 2	---	---	---	---	---	---	---	---	1	---	1	---	1	1
		Trial 3	---	---	---	---	---	---	---	---	1	---	1	---	1	1
		Trial 4	---	---	---	---	---	---	---	---	1	---	1	---	1	1
		Trial 5	---	---	---	---	---	---	---	---	-1	---	1	---	1	1
		Trial 6	---	---	---	---	---	---	---	---	1	---	1	---	1	1
		Trial 7	---	---	---	---	---	---	---	---	-1	---	1	---	1	1
		Trial 8	---	---	---	---	---	---	---	---	1	---	1	---	1	1
		Trial 9	---	---	---	---	---	---	---	---	1	---	1	---	1	1
		Trial 10	---	---	---	---	---	---	---	---	1	---	1	---	1	1		Average of Average		Standard Error
		Average	---	---	---	---	---	---	---	---	0.6	---	1	---	0.8	1		0.85		0.0957427
		Standard Error	---	---	---	---	---	---	---	---	0.266667	---	0	---	0.2	0
		Wilcoxon Signed-Rank Test
		W	---	---	---	---	---	---	---	---	33	---	55	---	44	55
		Z	---	---	---	---	---	---	---	---	-1.897	---	-3.162	---	-2.53	-3.162
		P	---	---	---	---	---	---	---	---	0.029	---	0.001	---	0.0055	0.001
	Stimulus:	Anteriorly Occlusion
		Animal	A1	B1	B2	B3	B4	B8	B9	B10	C1	C2	C4	C5	C6	C7
		Trial 1	---	---	---	---	---	---	---	---	0.6	---	0.6	---	-0.2	0.2
		Trial 2	---	---	---	---	---	---	---	---	-0.6	---	1	---	1	0.4
		Trial 3	---	---	---	---	---	---	---	---	0.6	---	-0.6	---	1	0.6
		Trial 4	---	---	---	---	---	---	---	---	-0.6	---	0.6	---	-1	0.4
		Trial 5	---	---	---	---	---	---	---	---	0.8	---	-0.6	---	1	-0.2
		Trial 6	---	---	---	---	---	---	---	---	0.6	---	-1	---	1	0.2
		Trial 7	---	---	---	---	---	---	---	---	-0.6	---	1	---	0.6	0.2
		Trial 8	---	---	---	---	---	---	---	---	0.8	---	1	---	1	0
		Trial 9	---	---	---	---	---	---	---	---	0.6	---	1	---	1	-0.2
		Trial 10	---	---	---	---	---	---	---	---	-0.8	---	1	---	1	-0.4		Average of Average		Standard Error
		Average	---	---	---	---	---	---	---	---	0.14	---	0.4	---	0.64	0.133333		0.328333		0.121026
		Standard Error	---	---	---	---	---	---	---	---	0.217153	---	0.254733	---	0.218683	0.110554
		Wilcoxon Signed-Rank Test
		W	---	---	---	---	---	---	---	---	13	---	30	---	40	19
		Z	---	---	---	---	---	---	---	---	-0.69	---	-1.576	---	-2.16	-1.15
		P	---	---	---	---	---	---	---	---	0.245	---	0.0575	---	0.0155	0.125

## Sheet: Population Analysis
	Varable:	Correct %
			Reduced Size	Low Contrast	Sketch	Contour	Black Silhouette	White Silhouette	Partial Occlusion	Posteriorly Occlusion	Anteriorly Occlusion
		A1	0.5	---	0.666667	---	---	---	---	---	---
		B1	1	0.3	0.111111	0.333333	0.3	0.3	0.888889	---	---
		B2	0.7	0.4	0.777778	---	---	---	---	---	---
		B3	0.7	0.428571	0.625	0.625	0.5	0.222222	0.666667	---	---
		B4	1	0.875	0.8	0.4	0.777778	0.6	0.5	---	---
		B8	0.888889	0.428571	0.7	0.555556	---	---	---	---	---
		B9	0.9	---	0.555556	---	---	---	---	---	---
		B10	0.9	---	---	---	---	---	---	---	---
		C1	0.9	1	0.8	0.25	0.9	0.777778	0.5	0.8	0.6
		C2	---	---	0.75	---	0.9	0.666667	0.6	---	---
		C4	1	0.666667	1	0.2	1	1	0.875	1	0.7
		C5	---	---	0.4	---	---	---	---	---	---
		C6	---	---	0.75	---	---	---	1	0.9	0.8
		C7	---	---	0.7	---	---	---	1	1	0.666667
		Wilcoxon Signed-Rank Test
		W	45	6	63	-13	13	6	21	10	10
		Z	-2.687	-0.508	-2.203	-1.363	-1.761	-0.631	-2.207	-1.841	-1.826
		P	0.007	0.611	0.028	0.173	0.078	0.528	0.027	0.066	0.068
	Varable:	Normalized Average Score
			Reduced Size	Low Contrast	Sketch	Contour	Black Silhouette	White Silhouette	Partial Occulsion	Posteriorly Occulsion	Anteriorly Occulsion
		A1	0	---	0.333333	---	---	---	---	---	---
		B1	1	-0.32	-0.444444	-0.266667	-0.24	-0.24	0.444444	---	---
		B2	0.52	-0.14	0.257143	---	---	---	---	---	---
		B3	0.48	-0.142857	0.2	-0.05	0.2	-0.288889	0.4	---	---
		B4	1	0.475	0.66	-0.14	0.577778	0.1	0.06	---	---
		B8	0.844444	-0.0285714	0.36	0.0888889	---	---	---	---	---
		B9	0.8	---	0.0333333	---	---	---	---	---	---
		B10	0.84	---	---	---	---	---	---	---	---
		C1	0.8	1	0.44	-0.375	0.76	0.488889	0.05	0.6	0.14
		C2	---	---	0.375	---	0.78	0.177778	0	---	---
		C4	1	0.2	0.866667	-0.26	1	0.92	0.6	1	0.4
		C5	---	---	0.04	---	---	---	---	---	---
		C6	---	---	0.225	---	---	---	0.666667	0.8	0.64
		C7	---	---	0.32	---	---	---	1	1	0.133333
		Wilcoxon Signed-Rank Test
		W	45	6	69	-17	17	7	28	10	10
		Z	-2.677	-0.507	-2.411	-1.782	-1.782	-0.734	-2.366	-1.841	-1.826
		P	0.007	0.612	0.016	0.075	0.075	0.463	0.018	0.066	0.068
